# Supplementary material
Source: PubMed Central journal article supplement (PMC5746466)
Supplement: NIHMS921337-supplement-Supplemental_Data.pdf [file NIHMS921337-supplement-Supplemental_Data.pdf]

## Supplement Figure I

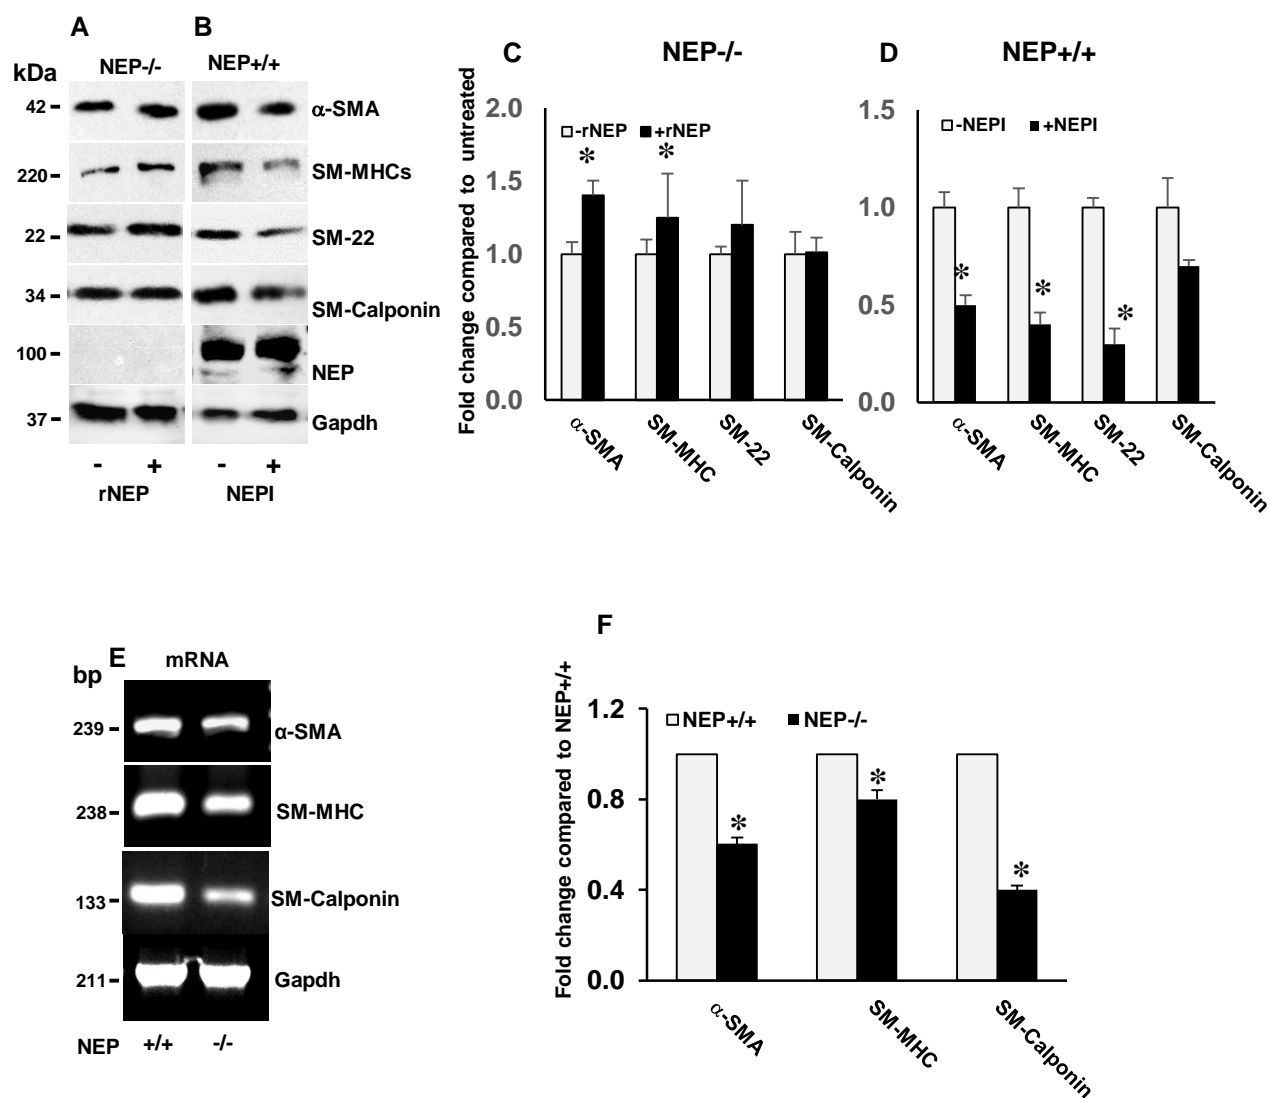

Supplement Figure I: Knockdown of NEP decreases SM-proteins and mRNA in PASCs. Panel A and C show the effect of rNEP on levels of SM-proteins in NEP-/- PASCs and Panel B and D show effect of NEP inhibitor, phosphoramidon (10μM). Levels of mRNA for SM-genes (α-actin, myosin, and calponin) were assessed by semi quantitative RT-PCR shown in Panel E, and average levels from 6 different isolates is shown in Panel F. Gapdh was used as loading control. (\*) represents p ≤ 0.05 for comparison between NEP+/+ and NEP -/- PASC or treated versus untreated.

## Supplement Figure II

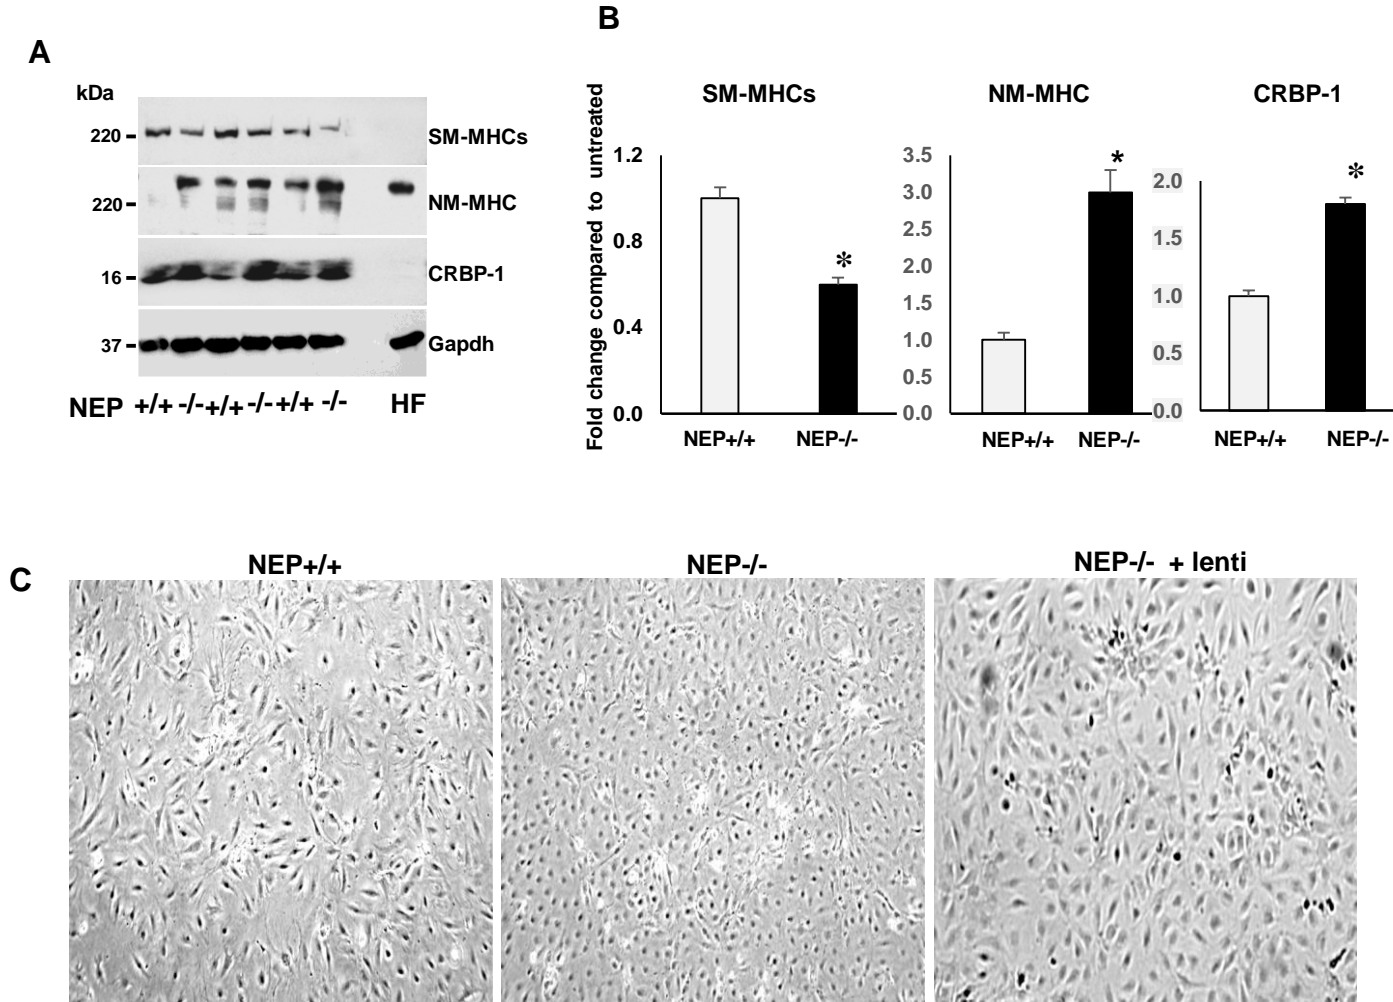

Supplement Figure II: Increase in NM-myosin in NEP<sup>-/-</sup> PASCs. To further characterize the phenotype of NEP<sup>-/-</sup> PASCs we probed cell lysates from NEP<sup>+/+</sup> and <sup>-/-</sup> PASCs with antibodies to SM-myosin, NM-myosin and CRBP; see Panel A. Panel B shows average levels from 6 different isolates normalized to Gapdh. Panel C shows representative light microscopy images (taken at 4x magnification using a Nikon microscope) for NEP<sup>+/+</sup>, NEP<sup>-/-</sup>, and NEP<sup>-/-</sup>-treated with NEP-lentivirus PASCs. (\*) represents  $p \leq 0.05$  for comparison between NEP<sup>+/+</sup> and NEP<sup>-/-</sup> PASC.

## Supplement Figure III

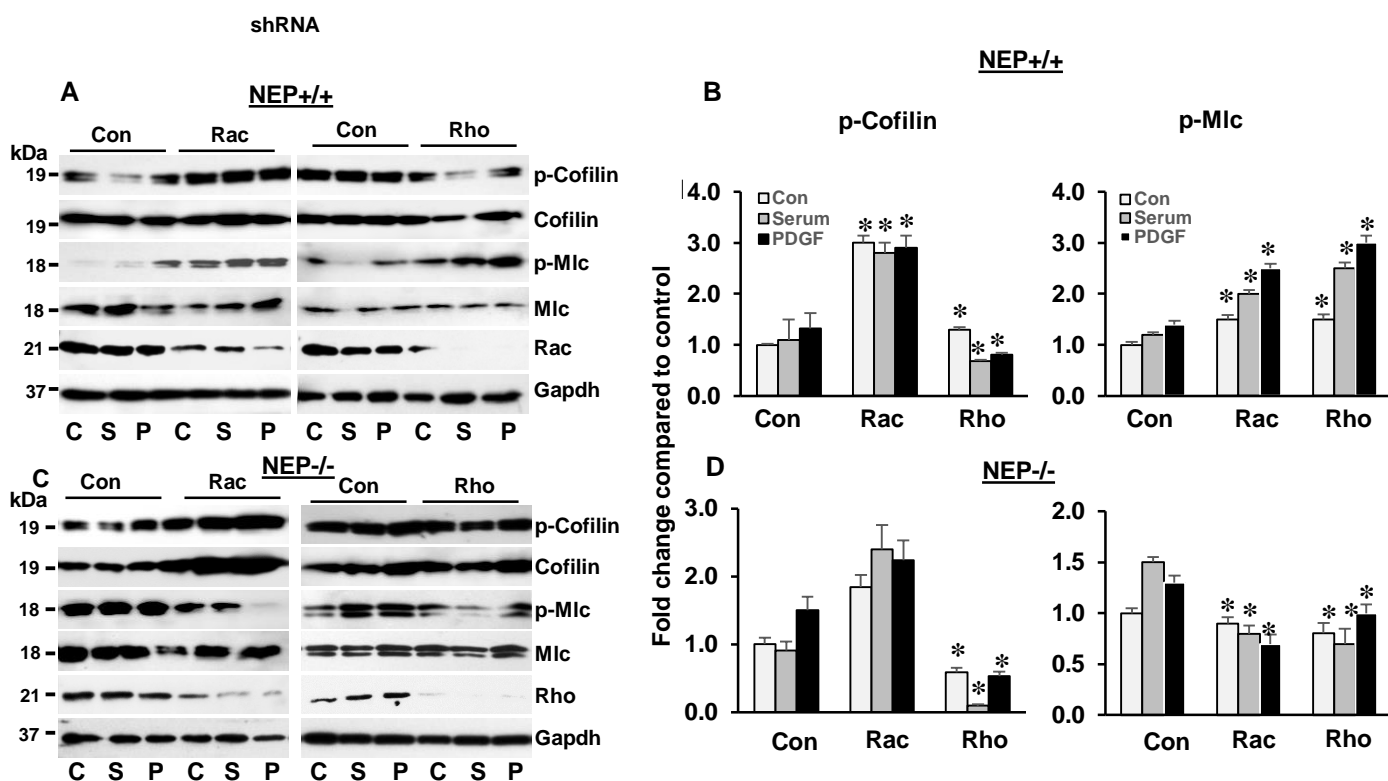

Supplement Figure III: ShRNA to Rac and RhoA inhibit phosphorylation of Cofilin and Mlc. NEP+/+ and -/- PSMCs were treated with control shRNA, or shRNA to Rac or Rho, and selected with puromycin and treated with serum 0.2% and PDGF (10ng/ml). Panel A shows the effect of shRNAs on phospho and total cofilin and Mlc levels in NEP+/+ PSMCs and Panel B the average effects on p-cofilin and p-Mlc levels from 3 different infections. Panels C and D show effects on NEP-/- PSMCs. (\*) represents  $p \leq 0.05$  for comparison between control and shRNA treated for NEP+/+ and NEP-/- PSMCs. (C=con, S=serum, P=PDGF).

# Supplement Figure IV

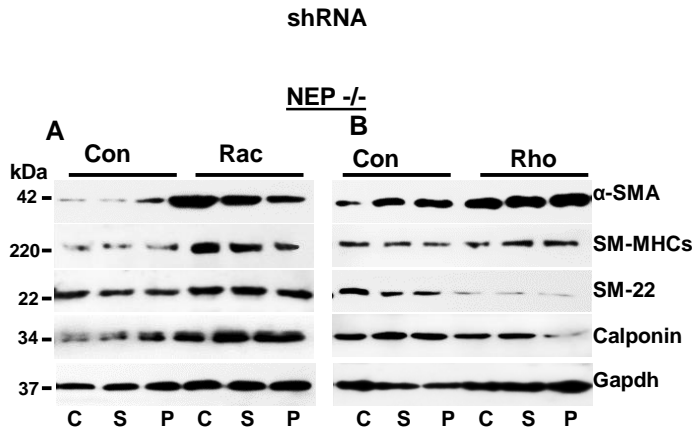

Supplement Figure IV: ShRNA to Rac, and RhoA, restores SM-protein expression NEP-/- PSMCs. NEP-/- PSMCs were infected with control shRNA or shRNA to Rac or Rho and selected with puromycin. Cells were treated with serum (0.2%) or PDGF(10ng/ml) for 24h and lysates were analyzed for SM-proteins. Panel A shows effect of Rac shRNA and Panel B effect of Rho shRNA on SM-proteins levels from 3 different isolates (C=con, S=serum, P=PDGF).

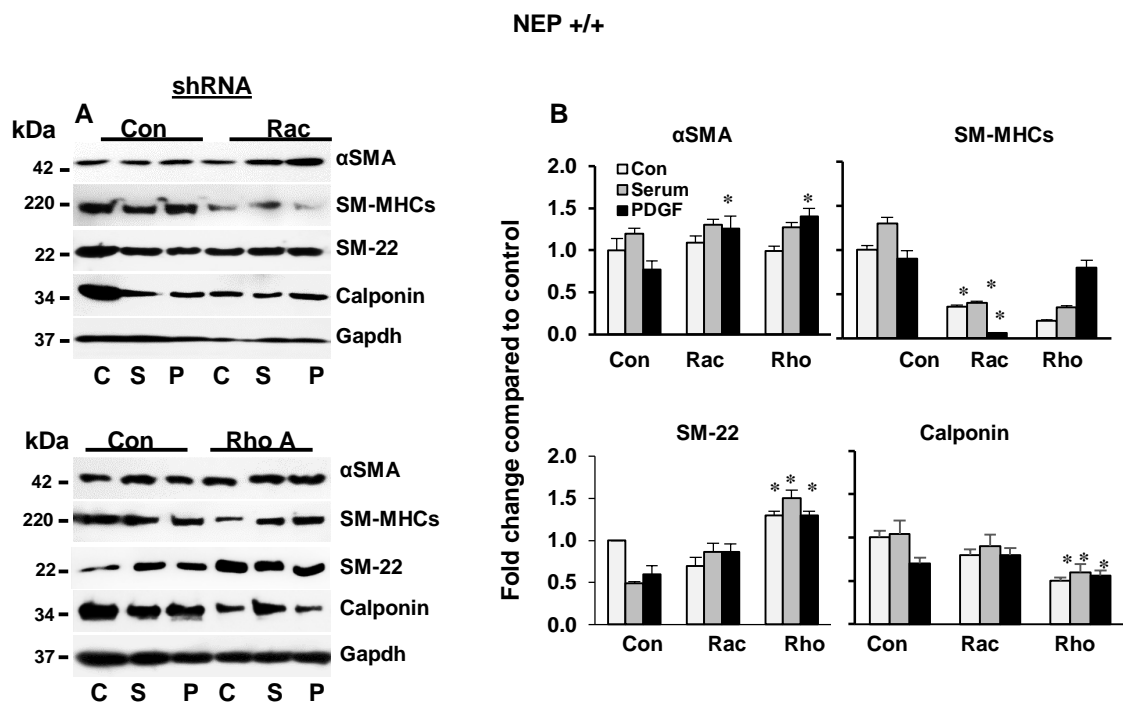

Supplement Figure V: Effect of shRNA to Rac and RhoA on SM-proteins and transcription factors in NEP+/+ PSMCs. NEP+/+ PSMCs treated with control shRNA, or shRNA to Rac Rho, and selected with puromycin. PSMCs were treated with serum or PDGF for 24h and lysates analyzed for SM-proteins and transcription factors. Panel A shows the effect of shRNAs on SM-proteins in NEP+/+ PSMCs treated with serum and PDGF. Graphical representation of the average effects of the shRNAs from 3 different infections on SM-proteins is shown in Panel B. (\*) represents  $p \leq 0.05$  for comparisons between control and shRNA treatment.

Supplement Figure VI

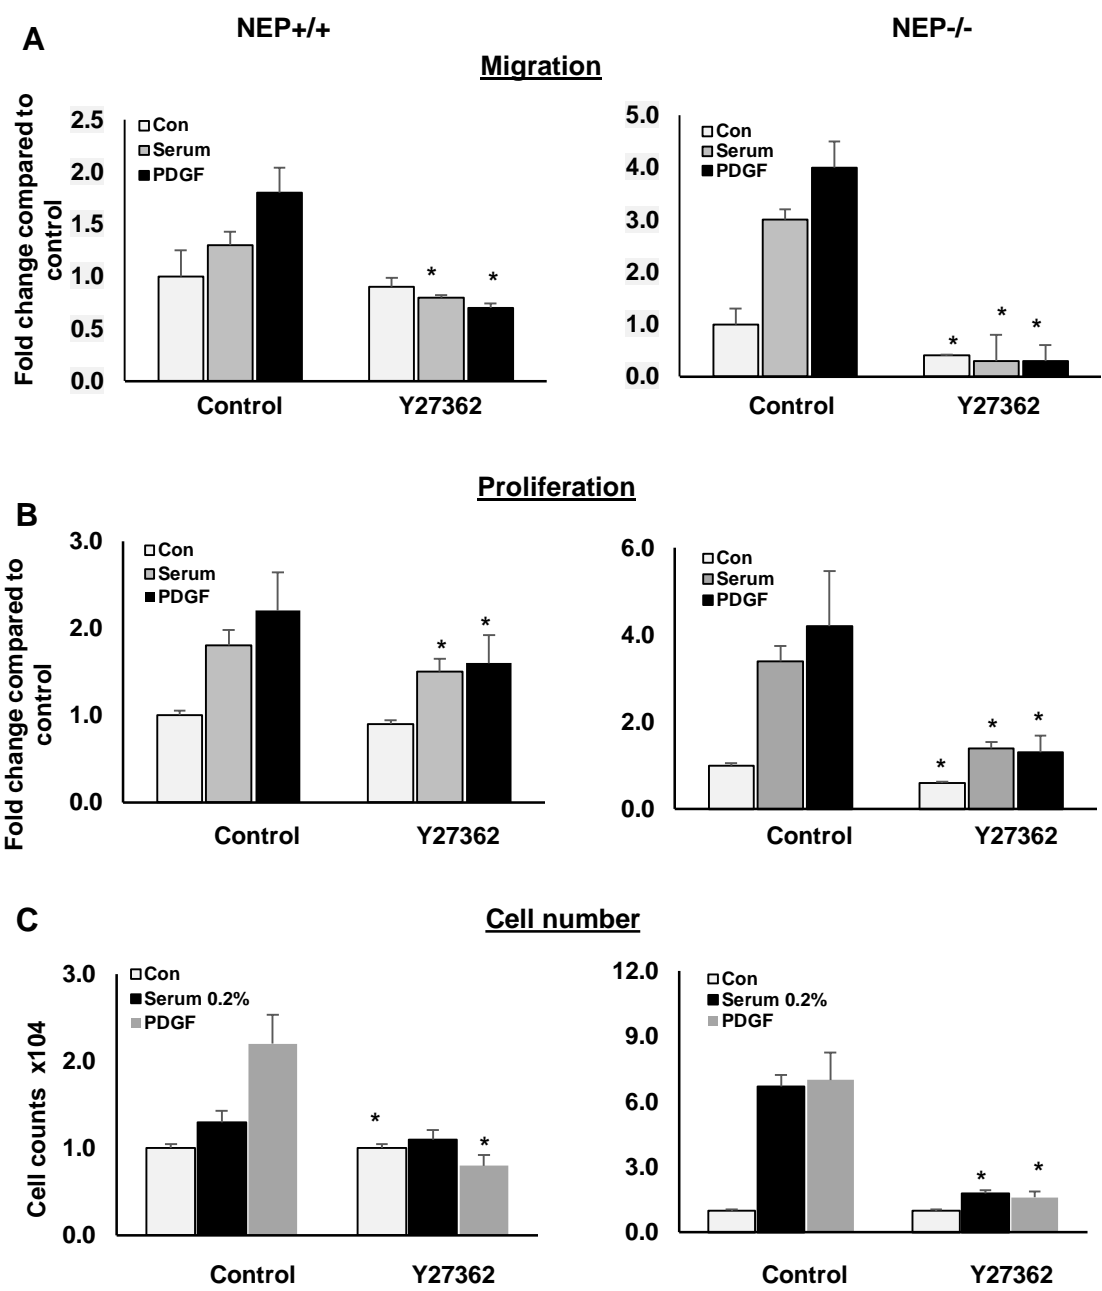

Supplement Figure VI: Rho kinase (Rock) inhibitor Y27362, attenuates migration in NEP+/+ and -/- PSMCs. NEP+/+ and -/- PSMCs were treated with the Rock inhibitor Y27362 (10µM). Migration, proliferation and cell numbers were measured in cells treated with serum (0.2%) or PDGF (10ng/ml) for 24h. Panel A shows effect of shRNA on migration and Panel B on proliferation and Panel C on cell numbers. NEP+/+ and -/- PSMCs from 3 different isolates. (\*) represents p≤ 0.05 for comparison between control and treated PSMC.

# Supplement Figure VII

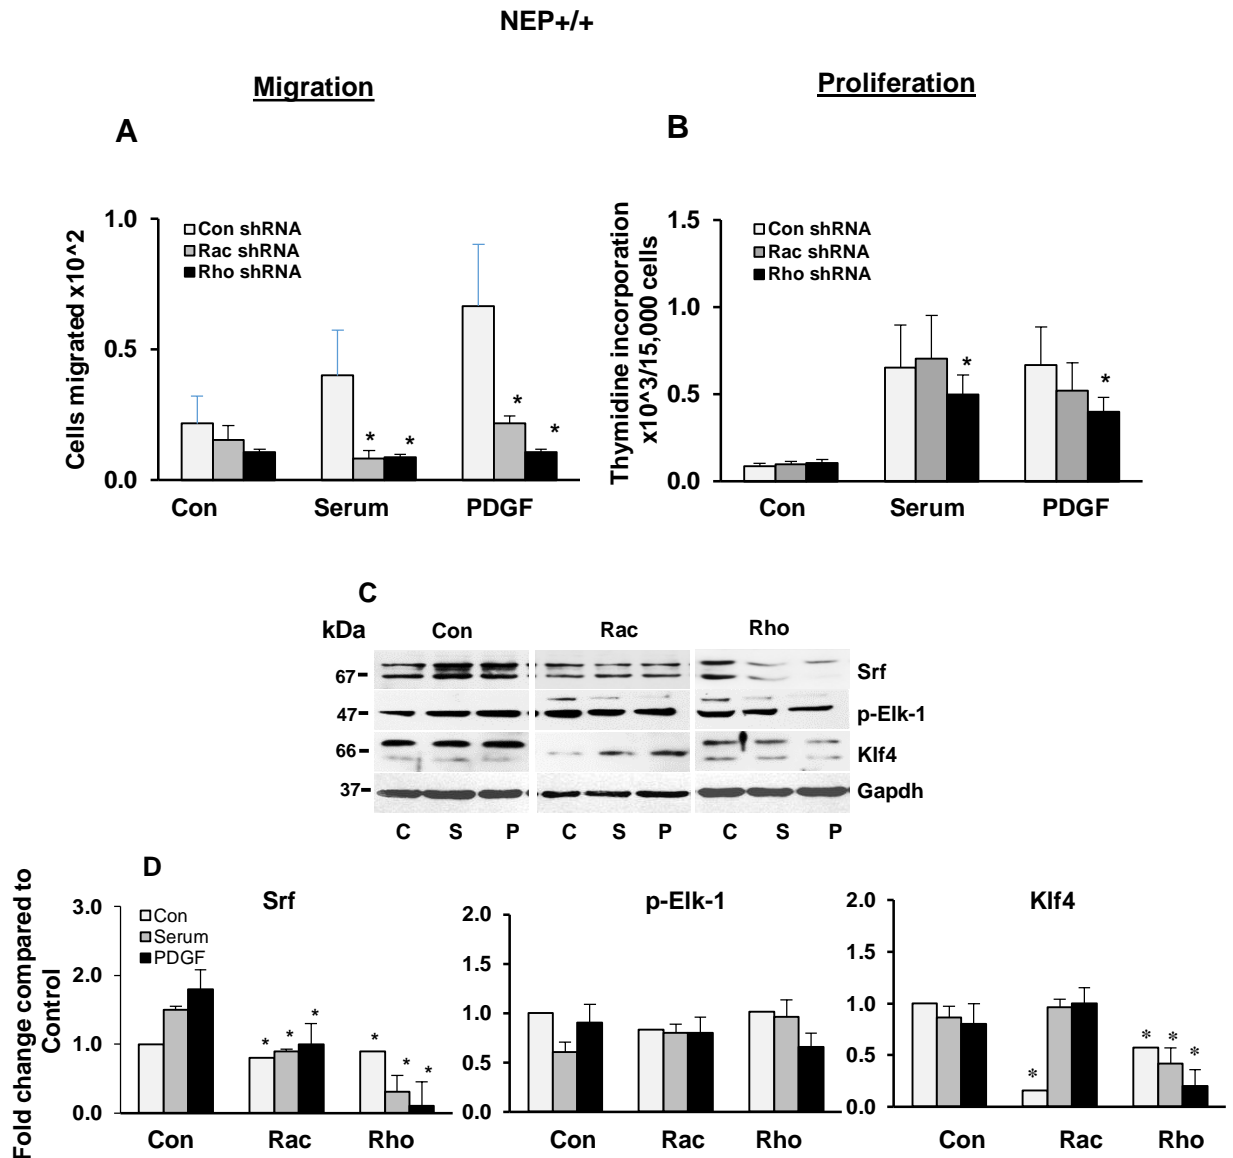

Supplement Figure VII: Effect of ShRNA to Rac and RhoA on migration, proliferation and transcription factor levels in NEP +/+ PSMCs. NEP+/+ PSMCs were infected with either control shRNA or shRNA to Rac or Rho and selected with puromycin. Migration and proliferation are measured in cells treated with serum (0.2%) or PDGF(10ng/ml) for 24h. Panel A shows effect of shRNA on migration and Panel B on proliferation of NEP+/+ PSMCs from 3 different isolates. Panel C shows effect of the shRNA on levels of Srf, p-Elk-1 and Klf4 in NEP+/+ PSMCs and Panel D graphical representation levels from 3 different isolates NORMALIZED TO Gapdh. (\*) represents  $p \leq 0.05$  for comparison between control and treated PSMC.

# Supplement Figure VIII

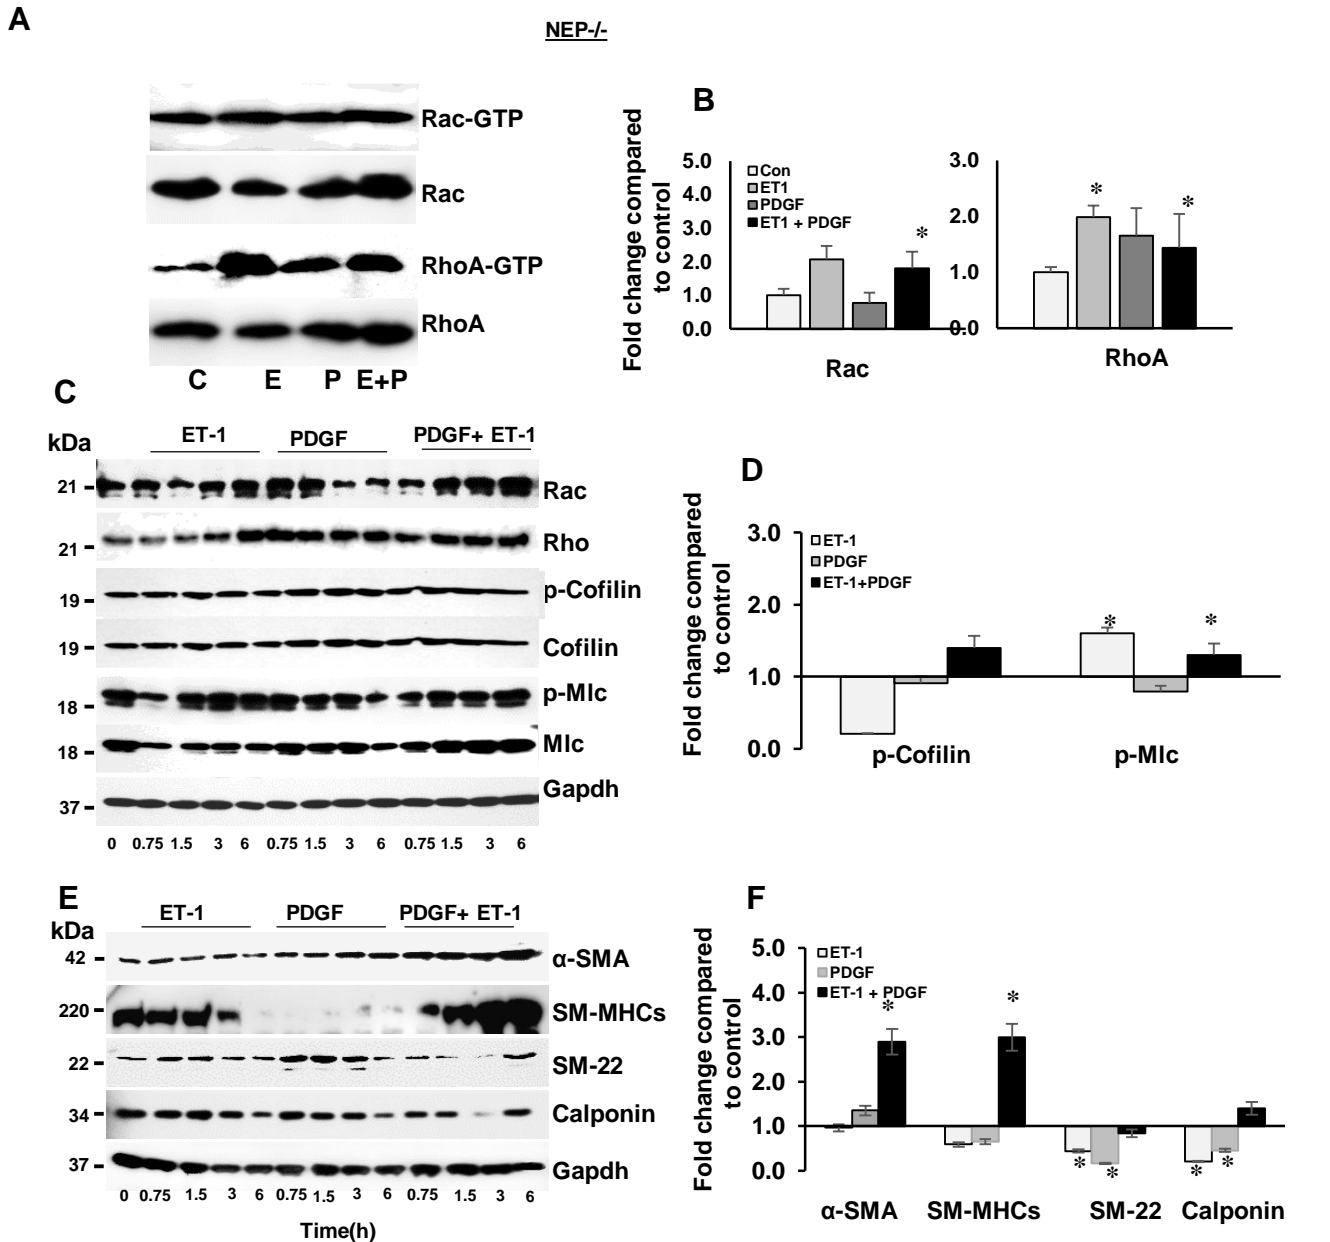

Supplement Figure VIII: Treatment of NEP<sup>-/-</sup> PSMCs with the NEP substrate, ET-1, and PDGF enhances the null phenotype. NEP<sup>-/-</sup> PSMCs were treated with PDGF (10 ng/ml) in the absence or presence of ET-1 (100 nM) for 24h and GTP bound Rac and Rho levels are shown in Panel A. Graphical representation of average levels from 6 paired isolates is shown in Panel B. A time course with the agonists (0.75, 1.5, 3, and 6h) was analyzed for levels of phospho and total cofilin and Mlc shown in Panels C and D. Levels of SM-proteins are shown in Panel E and F. \* p ≤ 0.05 for comparisons between control and treated (n=3).



# Supplement Figure IX

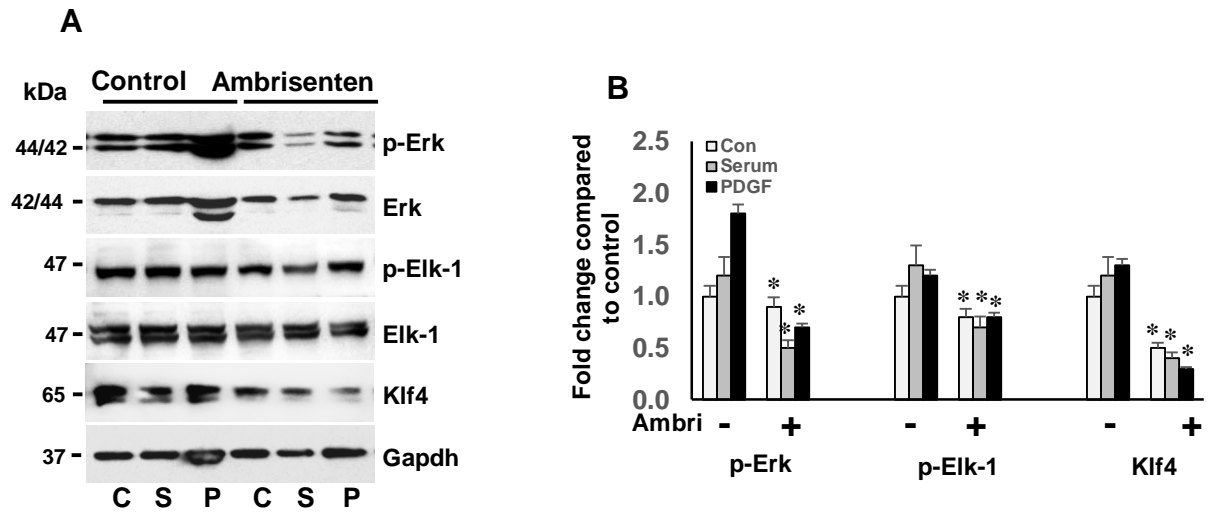

Supplement Figure IX An ETRA antagonist, Ambrisentan reduces p-Erk, p-Elk-1 and Klf4 levels in NEP-/- PSMCs. NEP<sup>-/-</sup> PSMCs were treated with serum 0.2% in the presence or absence of Ambrisentan (1 $\mu$ M). Levels of p-Erk, p-Elk-1, and Klf4 were assessed by Western blotting. Panel A shows the Western blot, and Panel B shows fold change after Ambrisentan treatment from 3 different isolates normalized to Gapdh. (\*) represents  $p \leq 0.05$  for comparison between control and inhibitor treated cells.

# Supplement Figure X

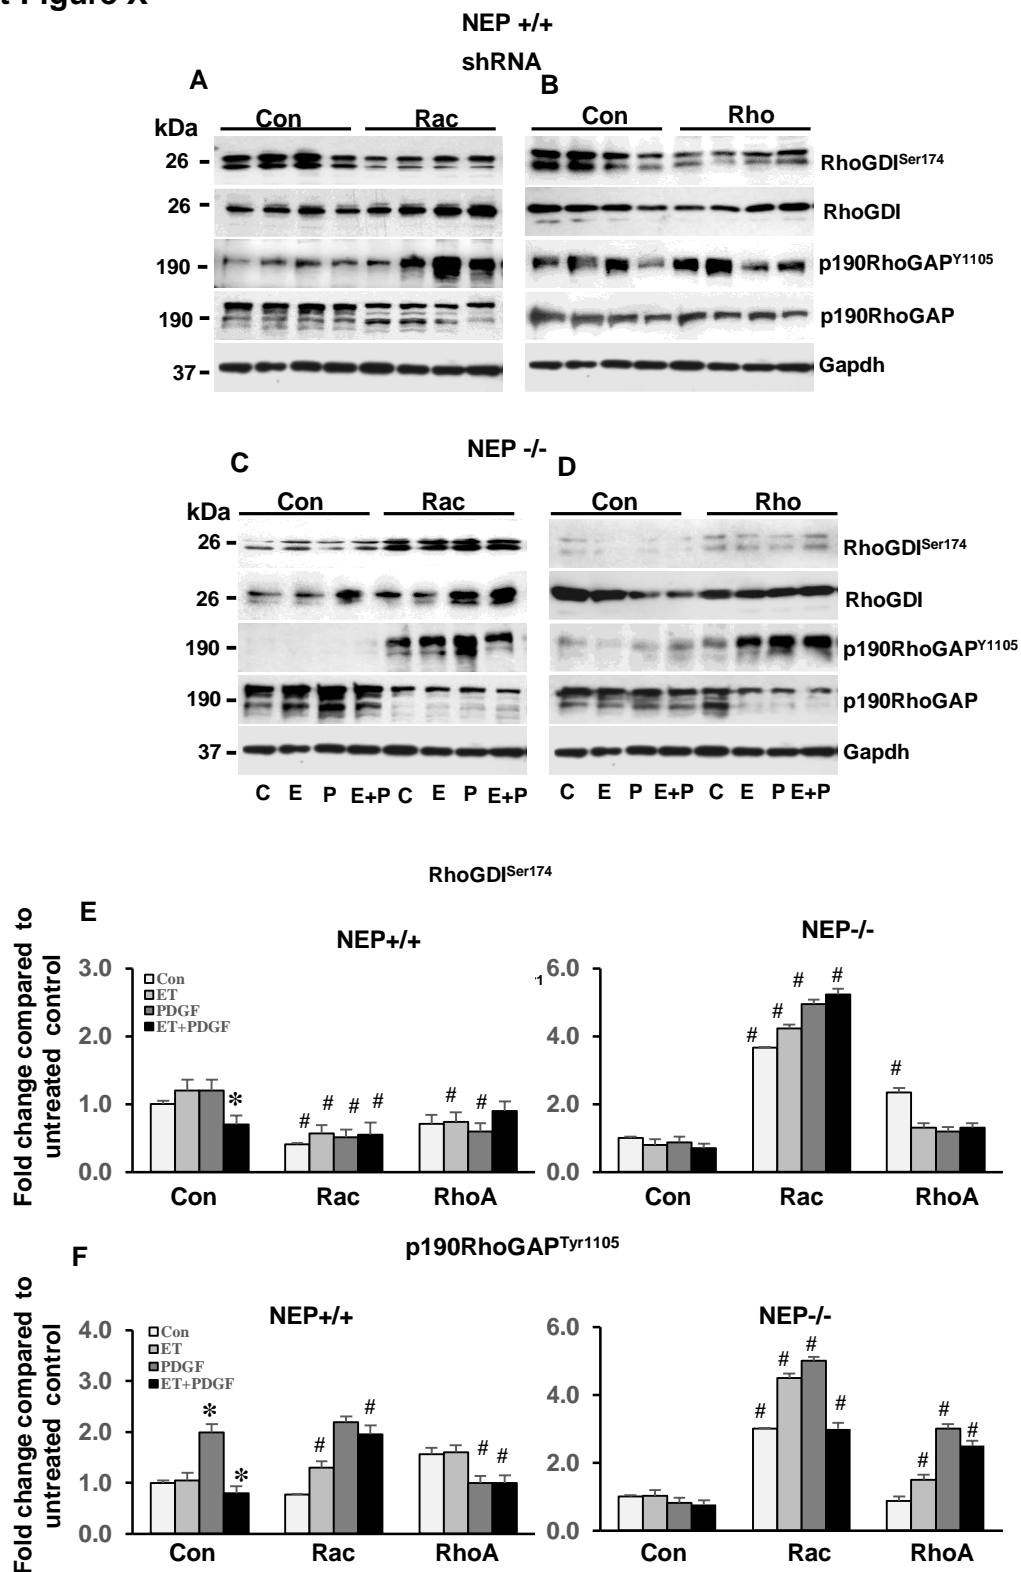

Supplement Figure X: Decreased levels of RhoGDI<sup>pSer174</sup> and p190 RhoGAP<sup>pY1105</sup> in NEP<sup>-/-</sup> PSMCs. NEP<sup>+/+</sup> and <sup>-/-</sup> PSMCs were infected with either control shRNA or shRNA to Rac or Rho and selected with puromycin. PSMCs were treated with PDGF (10 ng/ml) in the presence or absence ET-1(100 nM) for 6h and lysates probed with antibodies to phospho and total RhoGDI and p190 RhoGAP.. (C=con, E=ET1, P=PDGF). Panels A and B show representative Western blots for the effect of Rac and Rho shRNA in NEP<sup>+/+</sup> and Panels C and D in NEP<sup>-/-</sup> PSMCs. Panel E and F show fold change compared to control after shRNA treatment from 3 different isolates normalized to Gapdh. (\*) represents  $p \leq 0.05$  for comparison between control and shRNA treated cells.

# Supplement Figure XI

## Mouse Lung

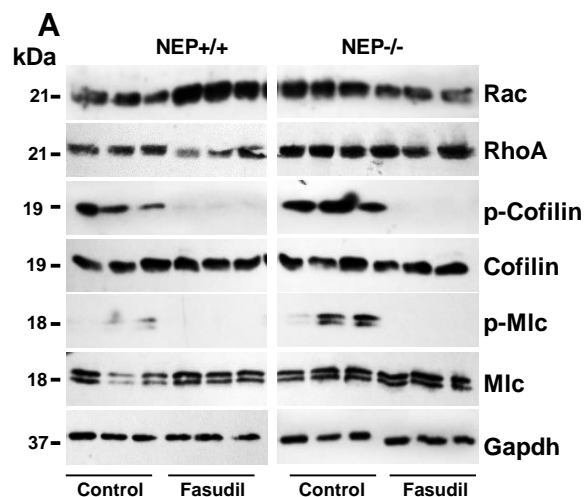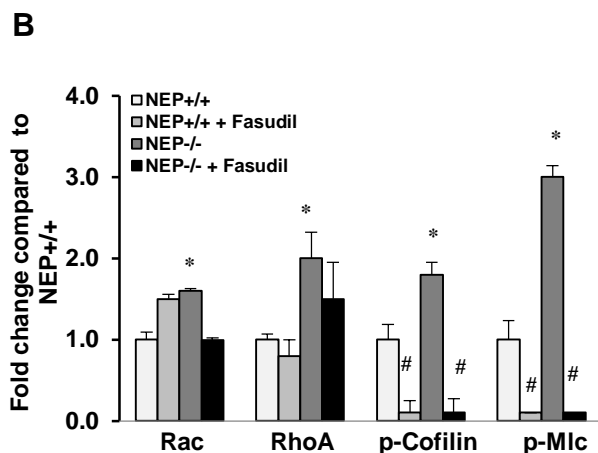

## Human Lung with Copd

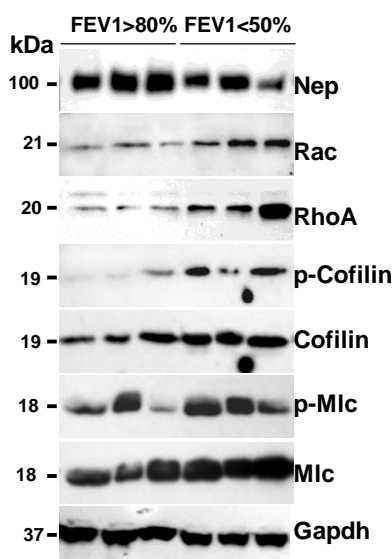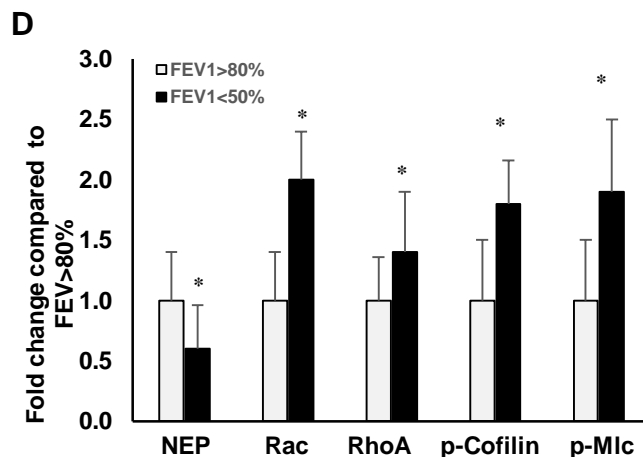

Supplement Figure XI: Increased activation of Rho GTPases and downstream effectors in lungs obtained from NEP<sup>-/-</sup> mice and Copd patients with FEV<sub>1</sub> <50%. Lung lysates from NEP<sup>+/+</sup> and <sup>-/-</sup> mice, and from Copd patients with FEV<sub>1</sub> >80%, and <50% were probed for levels of Rac Rho, phospho and total -Cofilin and -Mlc. Panel A, shows levels by Western blot in NEP<sup>+/+</sup> and <sup>-/-</sup> mice treated with fasudil and average expression from 6 different paired isolates is shown in Panel B. Panel C shows levels in samples from Copd lungs with FEV<sub>1</sub> >80% and < 50% . Average levels from 6 different isolates normalized to Gapdh is shown in Panel D. (\*)represents p ≤ 0.05 for comparison between NEP<sup>+/+</sup> to <sup>-/-</sup> mouse lung and Copd lung with FEV<sub>1</sub> <50% compared to FEV<sub>1</sub> < 80%.

**Supplement Figure XII**

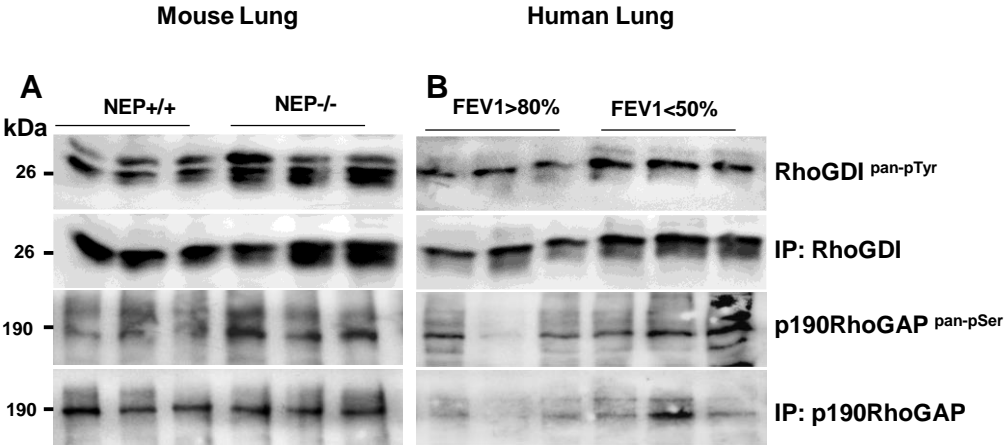

Supplement Figure XII: Increased RhoGDI<sup>pTyr</sup> and p190RhoGAP<sup>pSer</sup> levels in NEP<sup>-/-</sup> lungs and human Copd lungs . Lysates were prepared from lungs of NEP<sup>+/+</sup> and <sup>-/-</sup> mice and human Copd with FEV1 >80% and FEV1 < 50%. Lysates were immunoprecipitated with antibodies to RhoGDI and p190RhoGAP separated on SDS-PAGE and transferred to nitrocellulose, and probed with antibodies to Pan p-Tyr and, p-Ser and total RhoGDI and p190RhoGAP. Panel A shows representative Western blot from 3 different isolates of NEP<sup>+/+</sup> and <sup>-/-</sup> mouse lungs. Panel B show results from Copd lungs.

**Supplement Figure XIII**

**Mouse Lung**

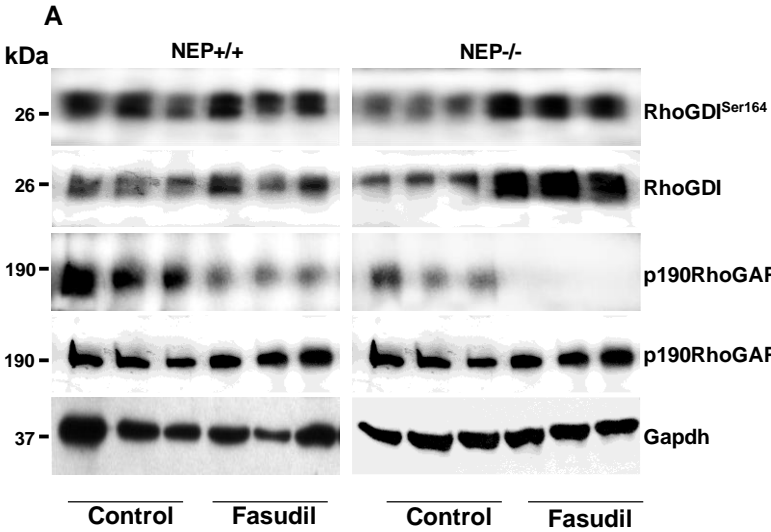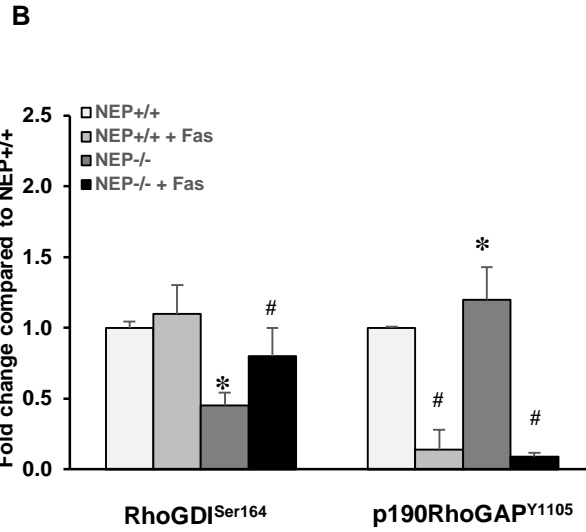

**Human lung with Copd**

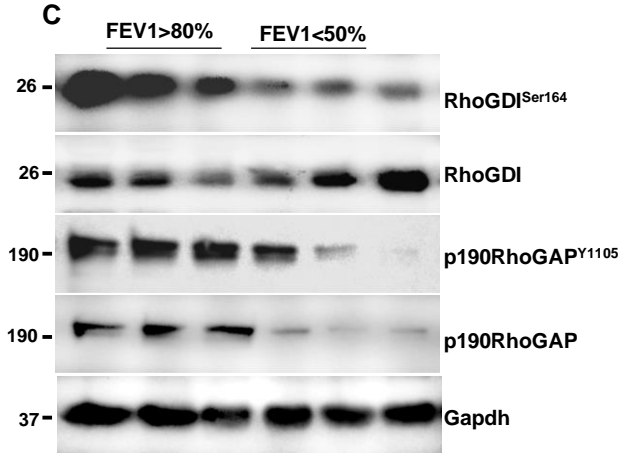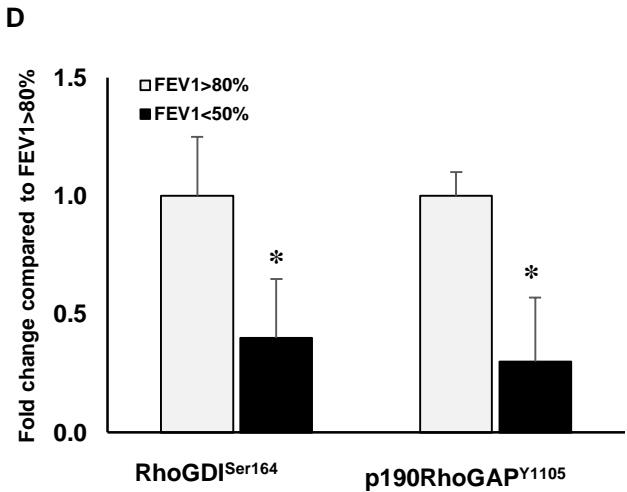

Supplement Figure XIII: Decreased Serine phosphorylation of RhoGDI and tyrosine phosphorylation of p190 RhoGAP in lungs from NEP<sup>-/-</sup> mice and humans with copd (FEV1<50%). NEP<sup>+/+</sup> and <sup>-/-</sup> mice were treated with fasudil 50mg/Kg) for 7d. Lung lysates from NEP<sup>+/+</sup> and <sup>-/-</sup> mice and from humans with copd were probed for phospho and total RhoGDI and p190 RhoGAP. Panels A and B show representative Western blot and average fold change in NEP<sup>-/-</sup> mice compared to NEP<sup>+/+</sup>. Panel E and F show fold change in human Copd with FEV1<50% compared to FEV1>80% from 6 different isolates normalized to Gapdh.. (\*)represents p≤ 0.05 for comparison between NEP<sup>+/+</sup> to <sup>-/-</sup> mice and Copd with FEV1<50% compared to FEV< 80% (#) for comparisons between control and fasudil treatment.
