# Supplementary material
Source: PubMed Central journal article supplement (PMC5746466)

# GRAPHIC ABSTRACT

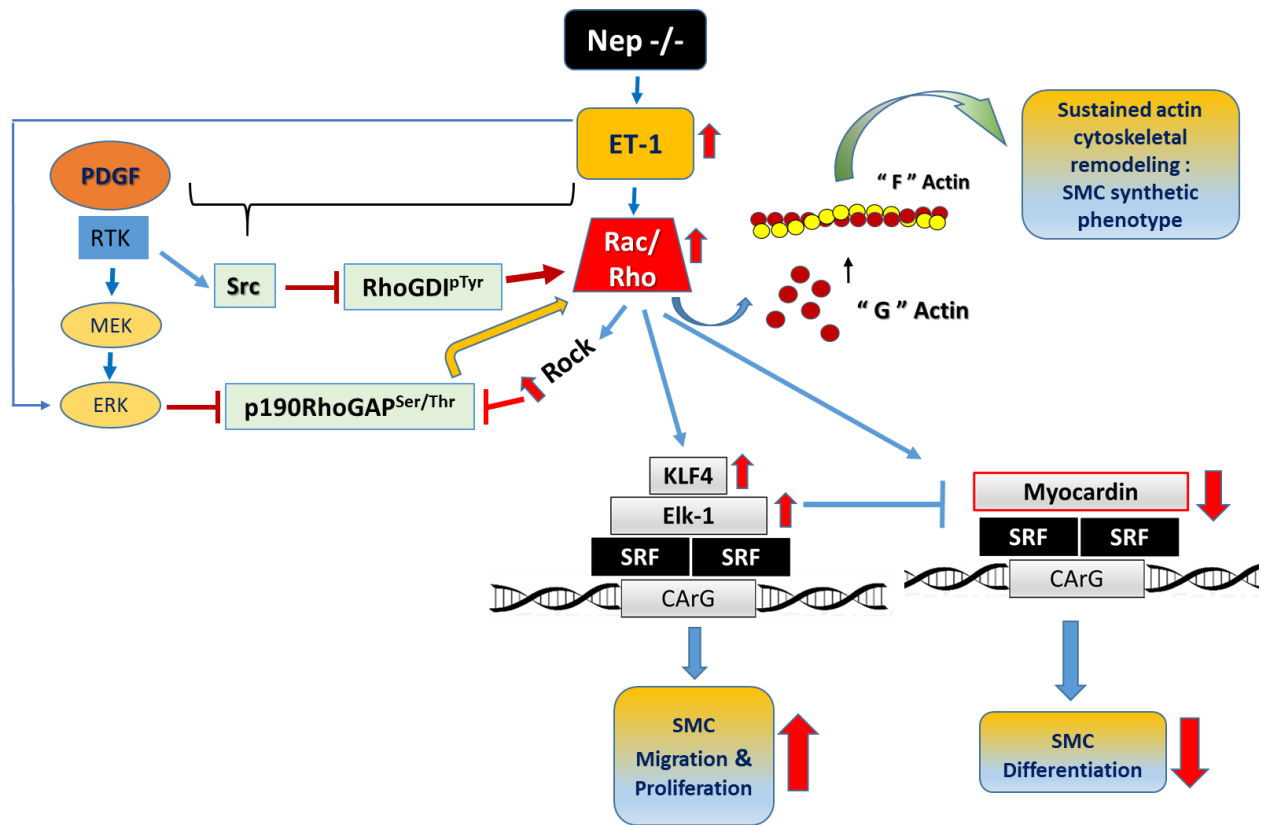

Supplement: NIHMS921337-supplement-Graphic_Abstract.pdf [file NIHMS921337-supplement-Graphic_Abstract.pdf]
